# Supplementary material for: Proteomics coupled with in vitro model to study the early crosstalk occurring between newly excysted juveniles of Fasciola hepatica and host intestinal cells
Source: PLoS Negl Trop Dis. 2022 Oct 12;16(10):e0010811. doi: 10.1371/journal.pntd.0010811 (PMC9555655; doi:10.1371/journal.pntd.0010811)
Supplement: S2 Table — Data were obtained during the Blast2GO annotation pipeline described previously. (XLSX) [file pntd.0010811.s004.xlsx]

## Sheet: MPSIEC Cytosol UP-regulated 
Protein ID	Uniprot Accession	Description	Log2FC	GO IDs (CC)	GO IDs (MF)	GO IDs (BP)
sp|Q8JZN5|ACAD9_MOUSE	Q8JZN5	Acyl-Coenzyme A dehydrogenase family, member 9	2.53655	GO:0005634 - nucleus; GO:0030425 - dendrite; GO:0031966 - mitochondrial membrane;	GO:0000062 - fatty-acyl-CoA binding; GO:0017099 - very-long-chain-acyl-CoA dehydrogenase activity; GO:0050660 - flavin adenine dinucleotide binding; GO:0070991 - medium-chain-acyl-CoA dehydrogenase activity	GO:0032981 -mitochondrial respiratory chain complex I assembly; GO:0051791 - medium-chain fatty acid metabolic process;;
sp|P10287|CADH3_MOUSE	P10287	cadherin-3 isoform a preproprotein	2.02301	GO:0005737 - cytoplasm; GO:0005912 - adherens junction; GO:0016021 - integral component of membrane; GO:0016342 - catenin complex	GO:0005509 - calcium ion binding; GO:0045296 - cadherin binding	GO:0001895 -retina homeostasis; GO:0007156 - homophilic cell adhesion via plasma membrane adhesion molecules; GO:0009410 - response to xenobiotic stimulus; GO:0010628 - positive regulation of gene expression; GO:0010838 - positive regulation of keratinocyte proliferation; GO:0031424 - keratinization; GO:0032773 - positive regulation of tyrosinase activity; GO:0032912 - negative regulation of tran…
sp|Q9CQW9|IFM3_MOUSE	Q9CQW9	interferon-induced transmembrane protein 3	2.00148	GO:0005634 - nucleus; GO:0005765 - lysosomal membrane; GO:0005783 - endoplasmic reticulum; GO:0005886 - plasma membrane; GO:0009986 - cell surface; GO:0016021 - integral component of membrane; GO:0031901 - early endosome membrane; GO:0031902 - late endosome membrane; GO:0032991 - protein-containing complex; GO:0045177 - apical part of cell; GO:0048471 - perinuclear region of cytoplasm		GO:0006898 -receptor-mediated endocytosis; GO:0008285 - negative regulation of cell population proliferation; GO:0032897 - negative regulation of viral transcription; GO:0034341 - response to interferon-gamma; GO:0035455 - response to interferon-alpha; GO:0035456 - response to interferon-beta; GO:0045071 - negative regulation of viral genome replication; GO:0046597 - negative regulation of viral …
sp|P49962|SRP09_MOUSE	P49962	signal recognition particle 9 kDa protein	1.68924	GO:0005786 - signal recognition particle, endoplasmic reticulum targeting	GO:0008312 - 7S RNA binding	GO:0006614 -SRP-dependent cotranslational protein targeting to membrane; GO:0045900 - negative regulation of translational elongation
sp|P51432|PLCB3_MOUSE	P51432	1-phosphatidylinositol 4,5-bisphosphate phosphodiesterase beta-3 isoform X1	1.6243	GO:0005634 - nucleus; GO:0032991 - protein-containing complex; GO:0042383 - sarcolemma; GO:0099524 - postsynaptic cytosol;;	GO:0004435 - phosphatidylinositol phospholipase C activity; GO:0005509 - calcium ion binding; GO:0005516 - calmodulin binding;;;	GO:0003073 -regulation of systemic arterial blood pressure; GO:0006892 - post-Golgi vesicle-mediated transport; GO:0007186 - G protein-coupled receptor signaling pathway; GO:0031161 - phosphatidylinositol catabolic process; GO:0032957 - inositol trisphosphate metabolic process; GO:0048015 - phosphatidylinositol-mediated signaling
sp|P59999|ARPC4_MOUSE	P59999	actin-related protein 2/3 complex subunit 4	1.58648	GO:0005634 - nucleus; GO:0005829 - cytosol; GO:0005885 - Arp2/3 protein complex; GO:0035861 - site of double-strand break; GO:0042995 - cell projection	GO:0005200 - structural constituent of cytoskeleton; GO:0019899 - enzyme binding; GO:0030674 - protein-macromolecule adaptor activity; GO:0051015 - actin filament binding;	GO:0034314 -Arp2/3 complex-mediated actin nucleation; GO:0038096 - Fc-gamma receptor signaling pathway involved in phagocytosis; GO:0048013 - ephrin receptor signaling pathway; GO:0061024 - membrane organization;
tr|E9QND8|E9QND8_MOUSE	E9QND8	atlastin-2 isoform 2	1.50326	GO:0016021 - integral component of membrane; GO:0098826 - endoplasmic reticulum tubular network membrane;	GO:0003924 - GTPase activity; GO:0005525 - GTP binding; GO:0042802 - identical protein binding	GO:0007030 -Golgi organization; GO:0051260 - protein homooligomerization; GO:1990809 - endoplasmic reticulum tubular network membrane organization
sp|Q9DB15|RM12_MOUSE	Q9DB15	Mitochondrial ribosomal protein L12	1.49198	GO:0005762 - mitochondrial large ribosomal subunit;;	GO:0003735 - structural constituent of ribosome;;	GO:0006390 -mitochondrial transcription; GO:0006412 - translation; GO:0045893 - positive regulation of transcription, DNA-templated
sp|Q9QXK3|COPG2_MOUSE	Q9QXK3	coatomer subunit gamma-2	1.48544	GO:0000139 - Golgi membrane; GO:0005783 - endoplasmic reticulum; GO:0005793 - endoplasmic reticulum-Golgi intermediate compartment; GO:0005829 - cytosol; GO:0030126 - COPI vesicle coat; GO:0030426 - growth cone	GO:0005198 - structural molecule activity;;;;;	GO:0006886 -intracellular protein transport; GO:0006888 - endoplasmic reticulum to Golgi vesicle-mediated transport; GO:0006891 - intra-Golgi vesicle-mediated transport; GO:0009306 - protein secretion; GO:0072384 - organelle transport along microtubule;
sp|P17809|GTR1_MOUSE	P17809	solute carrier family 2, facilitated glucose transporter member 1	1.44599	GO:0001917 - photoreceptor inner segment; GO:0001939 - female pronucleus; GO:0005829 - cytosol; GO:0005887 - integral component of plasma membrane; GO:0005901 - caveola; GO:0014704 - intercalated disc; GO:0016323 - basolateral plasma membrane; GO:0016324 - apical plasma membrane; GO:0030018 - Z disc; GO:0030496 - midbody; GO:0030864 - cortical actin cytoskeleton; GO:0031982 - vesicle; GO:0042383 …	GO:0005324 - long-chain fatty acid transporter activity; GO:0019900 - kinase binding; GO:0033300 - dehydroascorbic acid transmembrane transporter activity; GO:0042802 - identical protein binding; GO:0042910 - xenobiotic transmembrane transporter activity; GO:0043621 - protein self-association; GO:0055056 - D-glucose transmembrane transporter activity	GO:0001666 -response to hypoxia; GO:0007565 - female pregnancy; GO:0015911 - long-chain fatty acid import across plasma membrane; GO:0021987 - cerebral cortex development; GO:0032868 - response to insulin; GO:0042149 - cellular response to glucose starvation; GO:0042908 - xenobiotic transport; GO:0045494 - photoreceptor cell maintenance; GO:0065003 - protein-containing complex assembly; GO:007083…
sp|P26231|CTNA1_MOUSE	P26231	catenin alpha-1 isoform X1	1.42108	GO:0001669 - acrosomal vesicle; GO:0005829 - cytosol; GO:0005915 - zonula adherens; GO:0014704 - intercalated disc; GO:0015629 - actin cytoskeleton; GO:0016342 - catenin complex; GO:0016600 - flotillin complex; GO:0030027 - lamellipodium	GO:0005198 - structural molecule activity; GO:0008013 - beta-catenin binding; GO:0017166 - vinculin binding; GO:0042802 - identical protein binding; GO:0045295 - gamma-catenin binding; GO:0045296 - cadherin binding; GO:0051015 - actin filament binding	GO:0001541 -ovarian follicle development; GO:0007015 - actin filament organization; GO:0007163 - establishment or maintenance of cell polarity; GO:0007406 - negative regulation of neuroblast proliferation; GO:0007568 - aging; GO:0008584 - male gonad development; GO:0016264 - gap junction assembly; GO:0016477 - cell migration; GO:0031103 - axon regeneration; GO:0042475 - odontogenesis of dentin-co…
sp|Q8BLN5|ERG7_MOUSE	Q8BLN5	lanosterol synthase	1.3705	GO:0005789 - endoplasmic reticulum membrane; GO:0005811 - lipid droplet;	GO:0000250 - lanosterol synthase activity; GO:0042300 - beta-amyrin synthase activity;	GO:0006695 -cholesterol biosynthetic process; GO:0016104 - triterpenoid biosynthetic process; GO:0031647 - regulation of protein stability
tr|A0A0R4J0T5|A0A0R4J0T5_MOUSE	A0A0R4J0T5	CUGBP Elav-like family member 1 isoform X5	1.31389	GO:0005654 - nucleoplasm; GO:0010494 - cytoplasmic stress granule; GO:0097356 - perinucleolar compartment; GO:1990904 - ribonucleoprotein complex;;;;;;;;	GO:0003730 - mRNA 3'-UTR binding; GO:0031369 - translation initiation factor binding; GO:0036002 - pre-mRNA binding; GO:0042835 - BRE binding;;;;;;;;	GO:0000381 -regulation of alternative mRNA splicing, via spliceosome; GO:0006376 - mRNA splice site selection; GO:0007286 - spermatid development; GO:0008285 - negative regulation of cell population proliferation; GO:0010628 - positive regulation of gene expression; GO:0010942 - positive regulation of cell death; GO:0016441 - posttranscriptional gene silencing; GO:0021987 - cerebral cortex develo…
sp|Q62351|TFR1_MOUSE	Q62351	transferrin receptor protein 1	1.2047	GO:0005634 - nucleus; GO:0005739 - mitochondrion; GO:0005769 - early endosome; GO:0005887 - integral component of plasma membrane; GO:0005905 - clathrin-coated pit; GO:0009897 - external side of plasma membrane; GO:0016323 - basolateral plasma membrane; GO:0042470 - melanosome; GO:0048471 - perinuclear region of cytoplasm; GO:0055038 - recycling endosome membrane; GO:0070062 - extracellular exoso…	GO:0003725 - double-stranded RNA binding; GO:0004998 - transferrin receptor activity; GO:0005381 - iron ion transmembrane transporter activity; GO:0008235 - metalloexopeptidase activity; GO:0019901 - protein kinase binding; GO:0030544 - Hsp70 protein binding; GO:0042803 - protein homodimerization activity; GO:0044877 - protein-containing complex binding; GO:0051087 - chaperone binding	GO:0006508 -proteolysis; GO:0006879 - cellular iron ion homeostasis; GO:0010637 - negative regulation of mitochondrial fusion; GO:0030316 - osteoclast differentiation; GO:0030890 - positive regulation of B cell proliferation; GO:0031334 - positive regulation of protein-containing complex assembly; GO:0031623 - receptor internalization; GO:0031668 - cellular response to extracellular stimulus; GO:…
sp|Q61696|HS71A_MOUSE	Q61696	Hspa1b protein	0.904779	GO:0005576 - extracellular region; GO:0005739 - mitochondrion; GO:0005813 - centrosome; GO:0005814 - centriole; GO:0005829 - cytosol; GO:0005886 - plasma membrane; GO:0008180 - COP9 signalosome; GO:0016235 - aggresome; GO:0016607 - nuclear speck; GO:0045121 - membrane raft; GO:0048471 - perinuclear region of cytoplasm; GO:1990904 - ribonucleoprotein complex	GO:0001664 - G protein-coupled receptor binding; GO:0003714 - transcription corepressor activity; GO:0005524 - ATP binding; GO:0031072 - heat shock protein binding; GO:0031249 - denatured protein binding; GO:0031625 - ubiquitin protein ligase binding; GO:0042826 - histone deacetylase binding; GO:0044183 - protein folding chaperone; GO:0047485 - protein N-terminus binding; GO:0051082 - unfolded pr…	GO:0000723 -telomere maintenance; GO:0006281 - DNA repair; GO:0006402 - mRNA catabolic process; GO:0007041 - lysosomal transport; GO:0008285 - negative regulation of cell population proliferation; GO:0009408 - response to heat; GO:0016192 - vesicle-mediated transport; GO:0030308 - negative regulation of cell growth; GO:0032436 - positive regulation of proteasomal ubiquitin-dependent protein catab…
sp|P70697|DCUP_MOUSE	P70697	uroporphyrinogen decarboxylase	0.638595	GO:0005654 - nucleoplasm; GO:0005829 - cytosol	GO:0004853 - uroporphyrinogen decarboxylase activity; GO:0008198 - ferrous iron binding	GO:0006782 -protoporphyrinogen IX biosynthetic process; GO:0046502 - uroporphyrinogen III metabolic process

## Sheet: MPSIEC Cytosol DOWN-regulated
Protein ID	Uniprot Accession	Description	Log2FC	GO IDs (CC)	GO IDs (MF)	GO IDs (BP)
tr|A0A087WQE6|A0A087WQE6_MOUSE	A0A087WQE6	elongin-C	-4.6491	GO:0005829 - cytosol; GO:0030891 - VCB complex; GO:0031462 - Cul2-RING ubiquitin ligase complex; GO:0070449 - elongin complex;;	GO:0003746 - translation elongation factor activity; GO:0004842 - ubiquitin-protein transferase activity; GO:0005515 - protein binding; GO:0016853 - isomerase activity; GO:0044877 - protein-containing complex binding;	GO:0006414 -translational elongation; GO:0006511 - ubiquitin-dependent protein catabolic process; GO:0016567 - protein ubiquitination; GO:0032968 - positive regulation of transcription elongation from RNA polymerase II promoter; GO:0043687 - post-translational protein modification; GO:0061418 - regulation of transcription from RNA polymerase II promoter in response to hypoxia
sp|P83882|RL36A_MOUSE	P83882	RL36A protein	-4.08572	GO:0005840 - ribosome	GO:0003735 - structural constituent of ribosome	GO:0006412 -translation
tr|D3Z7C6|D3Z7C6_MOUSE	D3Z7C6	prostaglandin E synthase 3 isoform X3	-3.89057	GO:0000781 - chromosome, telomeric region; GO:0005654 - nucleoplasm; GO:0005697 - telomerase holoenzyme complex; GO:0005829 - cytosol; GO:0101031 - chaperone complex;;;;;;;;;;	GO:0003720 - telomerase activity; GO:0050220 - prostaglandin-E synthase activity; GO:0051082 - unfolded protein binding; GO:0051087 - chaperone binding; GO:0051879 - Hsp90 protein binding; GO:0070182 - DNA polymerase binding;;;;;;;;;	GO:0005978 -glycogen biosynthetic process; GO:0006805 - xenobiotic metabolic process; GO:0007004 - telomere maintenance via telomerase; GO:0008283 - cell population proliferation; GO:0019371 - cyclooxygenase pathway; GO:0042327 - positive regulation of phosphorylation; GO:0042921 - glucocorticoid receptor signaling pathway; GO:0043588 - skin development; GO:0050821 - protein stabilization; GO:005…
sp|P62281|RS11_MOUSE	P62281	40S ribosomal protein S11	-3.56952	GO:0022627 - cytosolic small ribosomal subunit	GO:0003735 - structural constituent of ribosome; GO:0019843 - rRNA binding	GO:0006413 -translational initiation
sp|Q64669|NQO1_MOUSE	Q64669	NAD(P)H dehydrogenase [quinone] 1	-3.47004	GO:0005829 - cytosol; GO:0030425 - dendrite; GO:0043025 - neuronal cell body;;;;;;;;;;;;;;;;;;;;;;;	GO:0004784 - superoxide dismutase activity; GO:0008753 - NADPH dehydrogenase (quinone) activity; GO:0042802 - identical protein binding; GO:0050136 - NADH dehydrogenase (quinone) activity;;;;;;;;;;;;;;;;;;;;;;	GO:0002931 -response to ischemia; GO:0006116 - NADH oxidation; GO:0007568 - aging; GO:0007584 - response to nutrient; GO:0009410 - response to xenobiotic stimulus; GO:0009410 - response to xenobiotic stimulus; GO:0009725 - response to hormone; GO:0009743 - response to carbohydrate; GO:0014075 - response to amine; GO:0019430 - removal of superoxide radicals; GO:0032355 - response to estradiol; GO:…
tr|A0A087WNP6|A0A087WNP6_MOUSE	A0A087WNP6	protein CDV3 homolog isoform X2	-3.37024
tr|Q3UI33|Q3UI33_MOUSE	Q3UI33	methionine aminopeptidase 2	-3.06854	GO:0005829 - cytosol; GO:0005886 - plasma membrane;;	GO:0005515 - protein binding; GO:0046872 - metal ion binding; GO:0070006 - metalloaminopeptidase activity;	GO:0016485 -protein processing; GO:0018206 - peptidyl-methionine modification; GO:0031365 - N-terminal protein amino acid modification; GO:0070084 - protein initiator methionine removal
sp|P61514|RL37A_MOUSE	P61514	60S ribosomal protein L37a	-3.05595	GO:0005840 - ribosome	GO:0003735 - structural constituent of ribosome	GO:0006412 -translation
sp|P62754|RS6_MOUSE	P62754	40S ribosomal protein S6	-2.91671	GO:0005730 - nucleolus; GO:0005783 - endoplasmic reticulum; GO:0005844 - polysome; GO:0022627 - cytosolic small ribosomal subunit; GO:0030425 - dendrite; GO:0036464 - cytoplasmic ribonucleoprotein granule; GO:0044297 - cell body; GO:0048471 - perinuclear region of cytoplasm;;;;;;;;;;;;;;	GO:0003729 - mRNA binding; GO:0003735 - structural constituent of ribosome; GO:0019901 - protein kinase binding;;;;;;;;;;;;;;;;;;;	GO:0000028 -ribosomal small subunit assembly; GO:0000082 - G1/S transition of mitotic cell cycle; GO:0000184 - nuclear-transcribed mRNA catabolic process, nonsense-mediated decay; GO:0001890 - placenta development; GO:0002181 - cytoplasmic translation; GO:0002309 - T cell proliferation involved in immune response; GO:0006364 - rRNA processing; GO:0006413 - translational initiation; GO:0006924 - a…
sp|P68373|TBA1C_MOUSE	P68373	tubulin alpha-1C chain	-2.71448	GO:0005634 - nucleus; GO:0005881 - cytoplasmic microtubule; GO:0045121 - membrane raft	GO:0003924 - GTPase activity; GO:0005200 - structural constituent of cytoskeleton; GO:0005525 - GTP binding	GO:0000226 -microtubule cytoskeleton organization; GO:0000278 - mitotic cell cycle; GO:0030705 - cytoskeleton-dependent intracellular transport
sp|P63168|DYL1_MOUSE	P63168	dynein light chain 1, cytoplasmic	-2.6352	GO:0000776 - kinetochore; GO:0005739 - mitochondrion; GO:0005813 - centrosome; GO:0005829 - cytosol; GO:0005868 - cytoplasmic dynein complex; GO:0005874 - microtubule; GO:0005886 - plasma membrane; GO:0008180 - COP9 signalosome; GO:0072686 - mitotic spindle; GO:0097542 - ciliary tip; GO:0101003 - ficolin-1-rich granule membrane; GO:1904115 - axon cytoplasm;;;;;;	GO:0004857 - enzyme inhibitor activity; GO:0008022 - protein C-terminus binding; GO:0019899 - enzyme binding; GO:0019904 - protein domain specific binding; GO:0030235 - nitric-oxide synthase regulator activity; GO:0042802 - identical protein binding; GO:0044877 - protein-containing complex binding; GO:0045505 - dynein intermediate chain binding; GO:0051959 - dynein light intermediate chain bindin…	GO:0006809 -nitric oxide biosynthetic process; GO:0006888 - endoplasmic reticulum to Golgi vesicle-mediated transport; GO:0006915 - apoptotic process; GO:0007052 - mitotic spindle organization; GO:0007286 - spermatid development; GO:0010389 - regulation of G2/M transition of mitotic cell cycle; GO:0019058 - viral life cycle; GO:0035721 - intraciliary retrograde transport; GO:0035774 - positive re…
sp|Q9D2M8|UB2V2_MOUSE	Q9D2M8	Ubiquitin-conjugating enzyme E2 variant 2	-2.42932	GO:0005654 - nucleoplasm; GO:0031372 - UBC13-MMS2 complex;;;;;;	GO:0005515 - protein binding;;;;;;;	GO:0000729 -DNA double-strand break processing; GO:0010976 - positive regulation of neuron projection development; GO:0032436 - positive regulation of proteasomal ubiquitin-dependent protein catabolic process; GO:0042275 - error-free postreplication DNA repair; GO:0043524 - negative regulation of neuron apoptotic process; GO:0045739 - positive regulation of DNA repair; GO:0051965 - positive regul…
sp|P35700|PRDX1_MOUSE	P35700	Peroxiredoxin 1	-2.41572	GO:0000791 - euchromatin; GO:0005730 - nucleolus; GO:0005759 - mitochondrial matrix; GO:0005782 - peroxisomal matrix; GO:0005829 - cytosol	GO:0008379 - thioredoxin peroxidase activity; GO:0020037 - heme binding; GO:0042802 - identical protein binding	GO:0008283 -cell population proliferation; GO:0019430 - removal of superoxide radicals; GO:0030101 - natural killer cell activation; GO:0032872 - regulation of stress-activated MAPK cascade; GO:0034101 - erythrocyte homeostasis; GO:0042267 - natural killer cell mediated cytotoxicity; GO:0042744 - hydrogen peroxide catabolic process; GO:0045454 - cell redox homeostasis; GO:1901222 - regulation of …
tr|G5E8P4|G5E8P4_MOUSE	G5E8P4	protein cordon-bleu isoform 2	-2.41093	GO:0001726 - ruffle; GO:0005884 - actin filament; GO:0005886 - plasma membrane; GO:0043025 - neuronal cell body; GO:0044294 - dendritic growth cone; GO:0044295 - axonal growth cone; GO:0048471 - perinuclear region of cytoplasm; GO:1990357 - terminal web;;;;;	GO:0003785 - actin monomer binding;;;;;;;;;;;;	GO:0000578 -embryonic axis specification; GO:0001757 - somite specification; GO:0001843 - neural tube closure; GO:0001889 - liver development; GO:0030041 - actin filament polymerization; GO:0030903 - notochord development; GO:0033504 - floor plate development; GO:0048565 - digestive tract development; GO:0048669 - collateral sprouting in absence of injury; GO:0051639 - actin filament network form…
tr|A0A1B0GSG5|A0A1B0GSG5_MOUSE	A0A1B0GSG5	ribonuclease inhibitor isoform X2	-2.36154	GO:0005654 - nucleoplasm; GO:0005829 - cytosol; GO:0032311 - angiogenin-PRI complex	GO:0008428 - ribonuclease inhibitor activity;;	GO:0043086 -negative regulation of catalytic activity; GO:0045765 - regulation of angiogenesis;
sp|Q8BVQ5|PPME1_MOUSE	Q8BVQ5	protein phosphatase methylesterase 1 isoform X2	-2.30424		GO:0019901 - protein kinase binding; GO:0051721 - protein phosphatase 2A binding; GO:0051722 - protein C-terminal methylesterase activity	GO:0006482 -protein demethylation
tr|Q9CQ43|Q9CQ43_MOUSE	Q9CQ43	Deoxyuridine 5'-triphosphate nucleotidohydrolase	-2.27207	GO:0005654 - nucleoplasm; GO:0005829 - cytosol;;;;	GO:0000287 - magnesium ion binding; GO:0004170 - dUTP diphosphatase activity; GO:0030547 - signaling receptor inhibitor activity; GO:0032556 - pyrimidine deoxyribonucleotide binding; GO:0042802 - identical protein binding; GO:0042975 - peroxisome proliferator activated receptor binding	GO:0006226 -dUMP biosynthetic process; GO:0043254 - regulation of protein-containing complex assembly; GO:0046081 - dUTP catabolic process; GO:2000272 - negative regulation of signaling receptor activity;;
sp|P48036|ANXA5_MOUSE	P48036	annexin V	-2.20331	GO:0005634 - nucleus; GO:0005783 - endoplasmic reticulum; GO:0005829 - cytosol; GO:0008021 - synaptic vesicle; GO:0009897 - external side of plasma membrane; GO:0014704 - intercalated disc; GO:0030018 - Z disc; GO:0030425 - dendrite; GO:0042383 - sarcolemma; GO:0043204 - perikaryon; GO:0043679 - axon terminus; GO:0072563 - endothelial microparticle	GO:0005388 - P-type calcium transporter activity; GO:0005509 - calcium ion binding; GO:0005544 - calcium-dependent phospholipid binding; GO:0017046 - peptide hormone binding; GO:0030971 - receptor tyrosine kinase binding; GO:0042802 - identical protein binding;;;;;;	GO:0030195 -negative regulation of blood coagulation; GO:0043065 - positive regulation of apoptotic process; GO:0051592 - response to calcium ion; GO:0070588 - calcium ion transmembrane transport; GO:0097211 - cellular response to gonadotropin-releasing hormone; GO:1901317 - regulation of flagellated sperm motility; GO:1902721 - negative regulation of prolactin secretion;;;;;
tr|Q3UMP4|Q3UMP4_MOUSE	Q3UMP4	plasminogen activator inhibitor 1 RNA-binding protein isoform X2	-2.20296	GO:0005634 - nucleus; GO:0005737 - cytoplasm	GO:0003730 -mRNA 3'-UTR binding
sp|P12787|COX5A_MOUSE	P12787	cytochrome c oxidase subunit 5A, mitochondrial	-2.1988	GO:0005751 - mitochondrial respiratory chain complex IV;	GO:0004129 - cytochrome-c oxidase activity; GO:0005515 - protein binding	GO:0006123 -mitochondrial electron transport, cytochrome c to oxygen; GO:1902600 - proton transmembrane transport
tr|Q8R5L1|Q8R5L1_MOUSE	Q8R5L1	complement component 1 Q subcomponent-binding protein, mitochondrial	-2.02409	GO:0005615 - extracellular space; GO:0005730 - nucleolus; GO:0005759 - mitochondrial matrix; GO:0005829 - cytosol; GO:0005886 - plasma membrane; GO:0009986 - cell surface; GO:0048786 - presynaptic active zone; GO:0098978 - glutamatergic synapse; GO:0098982 - GABA-ergic synapse;;;;;;;;;;	GO:0001849 - complement component C1q complex binding; GO:0003714 - transcription corepressor activity; GO:0003729 - mRNA binding; GO:0005080 - protein kinase C binding; GO:0005540 - hyaluronic acid binding; GO:0008494 - translation activator activity; GO:0030984 - kininogen binding; GO:0031690 - adrenergic receptor binding; GO:0097177 - mitochondrial ribosome binding;;;;;;;;;;	GO:0000122 -negative regulation of transcription by RNA polymerase II; GO:0006958 - complement activation, classical pathway; GO:0014065 - phosphatidylinositol 3-kinase signaling; GO:0030449 - regulation of complement activation; GO:0032689 - negative regulation of interferon-gamma production; GO:0032695 - negative regulation of interleukin-12 production; GO:0039534 - negative regulation of MDA-5…	P:GO:0000122; P:GO:0006958; P:GO:0014065; P:GO:0030449; P:GO:0032689; P:GO:0032695; P:GO:0039534; P:GO:0039536; P:GO:0042256; P:GO:0043065; P:GO:0045087; P:GO:0048025; P:GO:0051897; P:GO:0070131; P:GO:0090023; P:GO:1900026; P:GO:1901165; P:GO:2000510; F:GO:0001849; F:GO:0003714; F:GO:0003729; F:GO:0005080; F:GO:0005540; F:GO:0008494; F:GO:0030984; F:GO:0031690; F:GO:0097177; C:GO:0005615; C:GO:00…	P:negative regulation of transcription by RNA polymerase II; P:complement activation, classical pathway; P:phosphatidylinositol 3-kinase signaling; P:regulation of complement activation; P:negative regulation of interferon-gamma production; P:negative regulation of interleukin-12 production; P:negative regulation of MDA-5 signaling pathway; P:negative regulation of RIG-I signaling pathway; P:matu…
sp|P63276|RS17_MOUSE	P63276	40S ribosomal protein S17	-1.98223	GO:0022627 - cytosolic small ribosomal subunit; GO:0045202 - synapse; GO:0098556 - cytoplasmic side of rough endoplasmic reticulum membrane;	GO:0003735 - structural constituent of ribosome;;;	GO:0006364 -rRNA processing; GO:0006412 - translation; GO:0034101 - erythrocyte homeostasis; GO:0042274 - ribosomal small subunit biogenesis
sp|P45376|ALDR_MOUSE	P45376	aldose reductase	-1.97867	GO:0005615 - extracellular space; GO:0005654 - nucleoplasm; GO:0005829 - cytosol; GO:0032838 - plasma membrane bounded cell projection cytoplasm; GO:0033010 - paranodal junction; GO:0042629 - mast cell granule; GO:0043220 - Schmidt-Lanterman incisure; GO:0048471 - perinuclear region of cytoplasm; GO:0097454 - Schwann cell microvillus;;;;;;;;;;;;;;;;	GO:0001758 - retinal dehydrogenase activity; GO:0004032 - alditol:NADP+ 1-oxidoreductase activity; GO:0036130 - prostaglandin H2 endoperoxidase reductase activity; GO:0043795 - glyceraldehyde oxidoreductase activity; GO:0047655 - allyl-alcohol dehydrogenase activity; GO:0047834 - D-threo-aldose 1-dehydrogenase activity; GO:0047956 - glycerol dehydrogenase [NADP+] activity; GO:0052650 - NADP-retin…	GO:0001894 -tissue homeostasis; GO:0002070 - epithelial cell maturation; GO:0003091 - renal water homeostasis; GO:0005996 - monosaccharide metabolic process; GO:0006061 - sorbitol biosynthetic process; GO:0006693 - prostaglandin metabolic process; GO:0009414 - response to water deprivation; GO:0031098 - stress-activated protein kinase signaling cascade; GO:0035809 - regulation of urine volume; GO…
sp|Q9DD18|DTD1_MOUSE	Q9DD18	D-aminoacyl-tRNA deacylase 1	-1.95048	GO:0005634 - nucleus; GO:0005737 - cytoplasm;;	GO:0000049 - tRNA binding; GO:0003677 - DNA binding; GO:0046872 - metal ion binding; GO:0051500 - D-tyrosyl-tRNA(Tyr) deacylase activity	GO:0006260 -DNA replication; GO:0106074 - aminoacyl-tRNA metabolism involved in translational fidelity;;
tr|I7HLV2|I7HLV2_MOUSE	I7HLV2	60S ribosomal protein L10 isoform X1	-1.94399	GO:0005634 - nucleus; GO:0005790 - smooth endoplasmic reticulum; GO:0022625 - cytosolic large ribosomal subunit;;;;;;;	GO:0003735 - structural constituent of ribosome; GO:0045182 - translation regulator activity;;;;;;;;	GO:0000027 -ribosomal large subunit assembly; GO:0000184 - nuclear-transcribed mRNA catabolic process, nonsense-mediated decay; GO:0006364 - rRNA processing; GO:0006413 - translational initiation; GO:0006417 - regulation of translation; GO:0006614 - SRP-dependent cotranslational protein targeting to membrane; GO:0019083 - viral transcription; GO:0043066 - negative regulation of apoptotic process;…
sp|P97823|LYPA1_MOUSE	P97823	Lysophospholipase 1	-1.91609	GO:0005783 - endoplasmic reticulum; GO:0005829 - cytosol; GO:0005886 - plasma membrane; GO:0031965 - nuclear membrane	GO:0004622 - lysophospholipase activity; GO:0008474 - palmitoyl-(protein) hydrolase activity;;	GO:0002084 -protein depalmitoylation; GO:0006631 - fatty acid metabolic process; GO:0042997 - negative regulation of Golgi to plasma membrane protein transport;
tr|Q6NXL1|Q6NXL1_MOUSE	Q6NXL1	protein transport protein Sec24D isoform X1	-1.91394	GO:0005789 - endoplasmic reticulum membrane; GO:0005829 - cytosol; GO:0030127 - COPII vesicle coat; GO:0070971 - endoplasmic reticulum exit site	GO:0000149 - SNARE binding; GO:0008270 - zinc ion binding;;	GO:0001701 -in utero embryonic development; GO:0006886 - intracellular protein transport; GO:0090110 - COPII-coated vesicle cargo loading;
tr|Q3TIR6|Q3TIR6_MOUSE	Q3TIR6	prefoldin subunit 3	-1.91097	GO:0005634 - nucleus; GO:0005829 - cytosol; GO:0005844 - polysome; GO:0016272 - prefoldin complex;	GO:0001540 - amyloid-beta binding; GO:0015631 - tubulin binding; GO:0051082 - unfolded protein binding;;	GO:0006457 -protein folding; GO:0007017 - microtubule-based process; GO:0007021 - tubulin complex assembly; GO:1905907 - negative regulation of amyloid fibril formation;
tr|A0A0G2JDW7|A0A0G2JDW7_MOUSE	A0A0G2JDW7	40S ribosomal protein S27-like	-1.87201	GO:0005840 - ribosome	GO:0003735 - structural constituent of ribosome; GO:0046872 - metal ion binding	GO:0006412 -translation
tr|Q3TLP8|Q3TLP8_MOUSE	Q3TLP8	ras-related C3 botulinum toxin substrate 1 isoform X1	-1.86239	GO:0000139 - Golgi membrane; GO:0005802 - trans-Golgi network; GO:0005829 - cytosol; GO:0005884 - actin filament; GO:0030027 - lamellipodium; GO:0031234 - extrinsic component of cytoplasmic side of plasma membrane; GO:0032587 - ruffle membrane; GO:0036464 - cytoplasmic ribonucleoprotein granule; GO:0043197 - dendritic spine; GO:0055038 - recycling endosome membrane; GO:0098978 - glutamatergic syn…	GO:0003924 - GTPase activity; GO:0005525 - GTP binding; GO:0019901 - protein kinase binding; GO:0031267 - small GTPase binding; GO:0031996 - thioesterase binding; GO:0042826 - histone deacetylase binding; GO:0044877 - protein-containing complex binding; GO:0051022 - Rho GDP-dissociation inhibitor binding; GO:0051117 - ATPase binding;;;;;;;;;;;;;;;;	GO:0001934 -positive regulation of protein phosphorylation; GO:0002551 - mast cell chemotaxis; GO:0003376 - sphingosine-1-phosphate receptor signaling pathway; GO:0008283 - cell population proliferation; GO:0008361 - regulation of cell size; GO:0010592 - positive regulation of lamellipodium assembly; GO:0010595 - positive regulation of endothelial cell migration; GO:0010764 - negative regulation …
sp|Q9Z247|FKBP9_MOUSE	Q9Z247	FK506 binding protein 9, isoform CRA_a	-1.85325	GO:0005788 - endoplasmic reticulum lumen	GO:0003755 - peptidyl-prolyl cis-trans isomerase activity; GO:0005509 - calcium ion binding	GO:0000413 -protein peptidyl-prolyl isomerization; GO:0006457 - protein folding
tr|Q6ZWZ4|Q6ZWZ4_MOUSE	Q6ZWZ4	60S ribosomal protein L36	-1.81003	GO:0005730 - nucleolus; GO:0022625 - cytosolic large ribosomal subunit; GO:0042788 - polysomal ribosome	GO:0003735 - structural constituent of ribosome;;	GO:0000184 -nuclear-transcribed mRNA catabolic process, nonsense-mediated decay; GO:0002181 - cytoplasmic translation;
sp|Q9D1M0|SEC13_MOUSE	Q9D1M0	protein SEC13 homolog	-1.78551	GO:0000776 - kinetochore; GO:0005654 - nucleoplasm; GO:0005765 - lysosomal membrane; GO:0005789 - endoplasmic reticulum membrane; GO:0005829 - cytosol; GO:0030127 - COPII vesicle coat; GO:0031080 - nuclear pore outer ring; GO:0061700 - GATOR2 complex	GO:0005198 - structural molecule activity; GO:0042802 - identical protein binding;;;;;;	GO:0006606 -protein import into nucleus; GO:0032527 - protein exit from endoplasmic reticulum; GO:0051028 - mRNA transport; GO:0072659 - protein localization to plasma membrane; GO:0090110 - COPII-coated vesicle cargo loading; GO:1904263 - positive regulation of TORC1 signaling;;
sp|P14115|RL27A_MOUSE	P14115	60S ribosomal protein L27a	-1.77039	GO:0005783 - endoplasmic reticulum; GO:0022625 - cytosolic large ribosomal subunit	GO:0003735 - structural constituent of ribosome	GO:0006412 -translation
tr|A0A1W2P855|A0A1W2P855_MOUSE	A0A1W2P855	cell division cycle 5-like protein	-1.73403	GO:0000974 - Prp19 complex; GO:0005662 - DNA replication factor A complex; GO:0016607 - nuclear speck; GO:0048471 - perinuclear region of cytoplasm; GO:0071007 - U2-type catalytic step 2 spliceosome;;;	GO:0000977 - RNA polymerase II transcription regulatory region sequence-specific DNA binding; GO:0001222 - transcription corepressor binding; GO:0001228 - DNA-binding transcription activator activity, RNA polymerase II-specific; GO:0003723 - RNA binding; GO:0008157 - protein phosphatase 1 binding; GO:0019901 - protein kinase binding; GO:0043522 - leucine zipper domain binding; GO:0071987 - WD40-r…	GO:0000077 -DNA damage checkpoint signaling; GO:0000278 - mitotic cell cycle; GO:0000398 - mRNA splicing, via spliceosome; GO:0006281 - DNA repair; GO:0045944 - positive regulation of transcription by RNA polymerase II; GO:1904568 - cellular response to wortmannin; GO:1990090 - cellular response to nerve growth factor stimulus;
sp|P62717|RL18A_MOUSE	P62717	60S ribosomal protein L18a	-1.72565	GO:0014069 - postsynaptic density; GO:0022625 - cytosolic large ribosomal subunit; GO:0042788 - polysomal ribosome;;;	GO:0003723 - RNA binding; GO:0003735 - structural constituent of ribosome; GO:0005515 - protein binding;;;	GO:0000184 -nuclear-transcribed mRNA catabolic process, nonsense-mediated decay; GO:0002181 - cytoplasmic translation; GO:0006364 - rRNA processing; GO:0006413 - translational initiation; GO:0019083 - viral transcription; GO:0097327 - response to antineoplastic agent
sp|Q61166|MARE1_MOUSE	Q61166	microtubule-associated protein RP/EB family member 1	-1.72268	GO:0005794 - Golgi apparatus; GO:0005813 - centrosome; GO:0005925 - focal adhesion; GO:0030981 - cortical microtubule cytoskeleton; GO:0031253 - cell projection membrane; GO:0035371 - microtubule plus-end; GO:0036064 - ciliary basal body; GO:0051233 - spindle midzone; GO:1905721 - mitotic spindle astral microtubule end;	GO:0019901 - protein kinase binding; GO:0042802 - identical protein binding; GO:0051010 - microtubule plus-end binding;;;;;;;	GO:0001578 -microtubule bundle formation; GO:0016477 - cell migration; GO:0031115 - negative regulation of microtubule polymerization; GO:0031116 - positive regulation of microtubule polymerization; GO:0051225 - spindle assembly; GO:0051301 - cell division; GO:0071539 - protein localization to centrosome; GO:1903033 - positive regulation of microtubule plus-end binding; GO:1904825 - protein local…
tr|Q3UGB5|Q3UGB5_MOUSE	Q3UGB5	DAZ-associated protein 1 isoform X2	-1.6384	GO:0005654 - nucleoplasm; GO:0005829 - cytosol; GO:1990904 - ribonucleoprotein complex;;	GO:0003730 - mRNA 3'-UTR binding; GO:0008266 - poly(U) RNA binding; GO:0034046 - poly(G) binding; GO:0035613 - RNA stem-loop binding;	GO:0001893 -maternal placenta development; GO:0007283 - spermatogenesis; GO:0008283 - cell population proliferation; GO:0030154 - cell differentiation; GO:0048026 - positive regulation of mRNA splicing, via spliceosome
tr|Q3TL72|Q3TL72_MOUSE	Q3TL72	NEDD8-activating enzyme E1 catalytic subunit isoform X2	-1.6208	GO:0005634 - nucleus; GO:0005737 - cytoplasm; GO:0032991 - protein-containing complex;;;	GO:0005524 - ATP binding; GO:0016922 - nuclear receptor binding; GO:0019781 - NEDD8 activating enzyme activity; GO:0042802 - identical protein binding; GO:0044877 - protein-containing complex binding; GO:0046982 - protein heterodimerization activity	GO:0007113 -endomitotic cell cycle; GO:0045116 - protein neddylation; GO:0045892 - negative regulation of transcription, DNA-templated; GO:0051726 - regulation of cell cycle;;
tr|F8WGL3|F8WGL3_MOUSE	F8WGL3	cofilin-1	-1.61399	GO:0005576 - extracellular region; GO:0005829 - cytosol; GO:0005911 - cell-cell junction; GO:0005925 - focal adhesion; GO:0016363 - nuclear matrix; GO:0030175 - filopodium; GO:0030426 - growth cone; GO:0030864 - cortical actin cytoskeleton; GO:0031258 - lamellipodium membrane; GO:0031966 - mitochondrial membrane; GO:0032587 - ruffle membrane; GO:0043025 - neuronal cell body; GO:0043197 - dendriti…	GO:0005102 - signaling receptor binding; GO:0019903 - protein phosphatase binding; GO:0051015 - actin filament binding; GO:1902936 - phosphatidylinositol bisphosphate binding;;;;;;;;;;;;;;;;;;;;;;;;;;;;;;;;;;;;;;;;	GO:0000281 -mitotic cytokinesis; GO:0001755 - neural crest cell migration; GO:0001842 - neural fold formation; GO:0006468 - protein phosphorylation; GO:0006606 - protein import into nucleus; GO:0007162 - negative regulation of cell adhesion; GO:0009615 - response to virus; GO:0010592 - positive regulation of lamellipodium assembly; GO:0010593 - negative regulation of lamellipodium assembly; GO:00…
sp|P62830|RL23_MOUSE	P62830	60S ribosomal protein L23	-1.60825	GO:0005654 - nucleoplasm; GO:0005730 - nucleolus; GO:0022625 - cytosolic large ribosomal subunit;;;;;;;;;;;;	GO:0001223 - transcription coactivator binding; GO:0003735 - structural constituent of ribosome; GO:0031625 - ubiquitin protein ligase binding; GO:0070180 - large ribosomal subunit rRNA binding; GO:1990948 - ubiquitin ligase inhibitor activity;;;;;;;;;;	GO:0000122 -negative regulation of transcription by RNA polymerase II; GO:0000184 - nuclear-transcribed mRNA catabolic process, nonsense-mediated decay; GO:0002181 - cytoplasmic translation; GO:0006614 - SRP-dependent cotranslational protein targeting to membrane; GO:0008284 - positive regulation of cell population proliferation; GO:0010628 - positive regulation of gene expression; GO:0019083 - v…
sp|P17742|PPIA_MOUSE	P17742	peptidyl-prolyl cis-trans isomerase A	-1.59182	GO:0005576 - extracellular region; GO:0005634 - nucleus; GO:0005829 - cytosol; GO:0032991 - protein-containing complex	GO:0003755 - peptidyl-prolyl cis-trans isomerase activity; GO:0005178 - integrin binding; GO:0016018 - cyclosporin A binding; GO:1904399 - heparan sulfate binding	GO:0000187 -obsolete activation of MAPK activity; GO:0000413 - protein peptidyl-prolyl isomerization; GO:0006457 - protein folding; GO:0006469 - negative regulation of protein kinase activity; GO:0030182 - neuron differentiation; GO:0030593 - neutrophil chemotaxis; GO:0032148 - activation of protein kinase B activity; GO:0032873 - negative regulation of stress-activated MAPK cascade; GO:0034389 -…
sp|Q8BU14|SEC62_MOUSE	Q8BU14	translocation protein SEC62 isoform X1	-1.55905	GO:0030176 - integral component of endoplasmic reticulum membrane		GO:0031204 -posttranslational protein targeting to membrane, translocation
tr|G3UXG7|G3UXG7_MOUSE	G3UXG7	Casein kinase II subunit beta	-1.54899	GO:0005956 - protein kinase CK2 complex	GO:0016301 - kinase activity; GO:0019887 - protein kinase regulator activity	GO:0016055 -Wnt signaling pathway; GO:0045859 - regulation of protein kinase activity
sp|Q8VDK1|NIT1_MOUSE	Q8VDK1	nitrilase 1	-1.54148	GO:0005739 - mitochondrion	GO:0050406 - [acetyl-CoA carboxylase]-phosphatase activity; GO:0110050 - deaminated glutathione amidase activity	GO:0006470 -protein dephosphorylation; GO:0043605 - cellular amide catabolic process
sp|Q9D1R9|RL34_MOUSE	Q9D1R9	60S ribosomal protein L34	-1.53365	GO:0005783 - endoplasmic reticulum; GO:0022625 - cytosolic large ribosomal subunit	GO:0003735 - structural constituent of ribosome	GO:0006412 -translation
sp|Q80X85|RT07_MOUSE	Q80X85	28S ribosomal protein S7, mitochondrial	-1.51971	GO:0005739 - mitochondrion; GO:0005840 - ribosome		GO:0006412 -translation
sp|Q9WUK2|IF4H_MOUSE	Q9WUK2	eukaryotic translation initiation factor 4H isoform X1	-1.51889	GO:0005829 - cytosol; GO:0016281 - eukaryotic translation initiation factor 4F complex; GO:0048471 - perinuclear region of cytoplasm;	GO:0003743 - translation initiation factor activity; GO:0005515 - protein binding; GO:0033592 - RNA strand annealing activity; GO:0034057 - RNA strand-exchange activity	GO:0001731 -formation of translation preinitiation complex; GO:0019953 - sexual reproduction; GO:0048589 - developmental growth; GO:0097010 - eukaryotic translation initiation factor 4F complex assembly
tr|E9Q616|E9Q616_MOUSE	E9Q616	neuroblast differentiation-associated protein AHNAK isoform X1	-1.51325	GO:0005634 - nucleus; GO:0005829 - cytosol; GO:0015629 - actin cytoskeleton; GO:0042383 - sarcolemma; GO:0043034 - costamere; GO:0044291 - cell-cell contact zone; GO:0045121 - membrane raft; GO:0070062 - extracellular exosome	GO:0042802 - identical protein binding; GO:0044548 - S100 protein binding; GO:0097493 - structural molecule activity conferring elasticity;;;;;	GO:0043484 -regulation of RNA splicing; GO:1901385 - regulation of voltage-gated calcium channel activity;;;;;;
sp|Q60598|SRC8_MOUSE	Q60598	src substrate cortactin isoform X1	-1.50779	GO:0001726 - ruffle; GO:0002102 - podosome; GO:0005794 - Golgi apparatus; GO:0005829 - cytosol; GO:0005884 - actin filament; GO:0005905 - clathrin-coated pit; GO:0005925 - focal adhesion; GO:0008076 - voltage-gated potassium channel complex; GO:0030027 - lamellipodium; GO:0030426 - growth cone; GO:0030864 - cortical actin cytoskeleton; GO:0043197 - dendritic spine; GO:0098871 - postsynaptic actin…	GO:0005522 - profilin binding; GO:0051015 - actin filament binding; GO:0070064 - proline-rich region binding; GO:0071933 - Arp2/3 complex binding;;;;;;;;;;;	GO:0006886 -intracellular protein transport; GO:0006898 - receptor-mediated endocytosis; GO:0006930 - substrate-dependent cell migration, cell extension; GO:0030516 - regulation of axon extension; GO:0030838 - positive regulation of actin filament polymerization; GO:0031532 - actin cytoskeleton reorganization; GO:0045987 - positive regulation of smooth muscle contraction; GO:0048041 - focal adhes…
sp|Q8BVF2|PDCL3_MOUSE	Q8BVF2	phosducin-like protein 3	-1.49382	GO:0005654 - nucleoplasm; GO:0005783 - endoplasmic reticulum; GO:0005829 - cytosol; GO:0032991 - protein-containing complex; GO:0048471 - perinuclear region of cytoplasm; GO:0097356 - perinucleolar compartment;;;;	GO:0043184 - vascular endothelial growth factor receptor 2 binding; GO:0044183 - protein folding chaperone;;;;;;;;	GO:0001938 -positive regulation of endothelial cell proliferation; GO:0006915 - apoptotic process; GO:0010628 - positive regulation of gene expression; GO:0030036 - actin cytoskeleton organization; GO:0034605 - cellular response to heat; GO:0045766 - positive regulation of angiogenesis; GO:0050730 - regulation of peptidyl-tyrosine phosphorylation; GO:0050821 - protein stabilization; GO:1903645 - …
tr|Q7TQE2|Q7TQE2_MOUSE	Q7TQE2	zyxin isoform X2	-1.47312	GO:0001725 - stress fiber; GO:0005634 - nucleus; GO:0005829 - cytosol; GO:0005886 - plasma membrane; GO:0005912 - adherens junction; GO:0005925 - focal adhesion; GO:0045335 - phagocytic vesicle	GO:0005515 - protein binding; GO:0046872 - metal ion binding;;;;;	GO:0007160 -cell-matrix adhesion; GO:0007179 - transforming growth factor beta receptor signaling pathway; GO:0007229 - integrin-mediated signaling pathway; GO:0043149 - stress fiber assembly; GO:0050727 - regulation of inflammatory response; GO:0071346 - cellular response to interferon-gamma;
sp|P70195|PSB7_MOUSE	P70195	proteasome subunit beta type-7 precursor	-1.47126	GO:0005829 - cytosol; GO:0016604 - nuclear body; GO:0019774 - proteasome core complex, beta-subunit complex	GO:0004298 - threonine-type endopeptidase activity;;	GO:0010499 -proteasomal ubiquitin-independent protein catabolic process; GO:0043161 - proteasome-mediated ubiquitin-dependent protein catabolic process;
sp|Q9D823|RL37_MOUSE	Q9D823	60S ribosomal protein L37	-1.42606	GO:0022625 - cytosolic large ribosomal subunit; GO:0045202 - synapse;;;;;;	GO:0003735 - structural constituent of ribosome; GO:0019838 - growth factor binding; GO:0019843 - rRNA binding; GO:0046872 - metal ion binding; GO:0097371 - MDM2/MDM4 family protein binding; GO:1990948 - ubiquitin ligase inhibitor activity;;	GO:0000184 -nuclear-transcribed mRNA catabolic process, nonsense-mediated decay; GO:0002181 - cytoplasmic translation; GO:0006364 - rRNA processing; GO:0006413 - translational initiation; GO:0006614 - SRP-dependent cotranslational protein targeting to membrane; GO:0019083 - viral transcription; GO:1901798 - positive regulation of signal transduction by p53 class mediator; GO:1904667 - negative re…
tr|E9QL13|E9QL13_MOUSE	E9QL13	RNA-binding protein 14	-1.41535	GO:0005667 - transcription regulator complex; GO:0005730 - nucleolus; GO:0005737 - cytoplasm; GO:0016607 - nuclear speck;;	GO:0003729 - mRNA binding; GO:0030374 - nuclear receptor coactivator activity;;;;	GO:0000398 -mRNA splicing, via spliceosome; GO:0002218 - activation of innate immune response; GO:0016575 - histone deacetylation; GO:0045944 - positive regulation of transcription by RNA polymerase II; GO:0046600 - negative regulation of centriole replication; GO:0060395 - SMAD protein signal transduction
sp|Q61239|FNTA_MOUSE	Q61239	protein farnesyltransferase/geranylgeranyltransferase type-1 subunit alpha	-1.41278	GO:0005875 - microtubule associated complex; GO:0005886 - plasma membrane; GO:0005953 - CAAX-protein geranylgeranyltransferase complex; GO:0005965 - protein farnesyltransferase complex;;;;;;;;;;	GO:0004660 - protein farnesyltransferase activity; GO:0004662 - CAAX-protein geranylgeranyltransferase activity; GO:0004663 - Rab geranylgeranyltransferase activity; GO:0008017 - microtubule binding; GO:0008270 - zinc ion binding; GO:0030548 - acetylcholine receptor regulator activity; GO:0030971 - receptor tyrosine kinase binding; GO:0036094 - small molecule binding; GO:0042277 - peptide binding…	GO:0008284 -positive regulation of cell population proliferation; GO:0010035 - response to inorganic substance; GO:0014070 - response to organic cyclic compound; GO:0018343 - protein farnesylation; GO:0018344 - protein geranylgeranylation; GO:0034097 - response to cytokine; GO:0043066 - negative regulation of apoptotic process; GO:0045213 - neurotransmitter receptor metabolic process; GO:0045787 …
sp|Q99P31|HPBP1_MOUSE	Q99P31	hsp70-binding protein 1	-1.39321	GO:0005783 - endoplasmic reticulum;;	GO:0000774 - adenyl-nucleotide exchange factor activity; GO:0031625 - ubiquitin protein ligase binding;	GO:0031398 -positive regulation of protein ubiquitination; GO:0032436 - positive regulation of proteasomal ubiquitin-dependent protein catabolic process; GO:0050790 - regulation of catalytic activity
sp|O35972|RM23_MOUSE	O35972	39S ribosomal protein L23, mitochondrial	-1.36834	GO:0001650 - fibrillar center; GO:0005762 - mitochondrial large ribosomal subunit	GO:0003735 - structural constituent of ribosome	GO:0032543 -mitochondrial translation
sp|P10711|TCEA1_MOUSE	P10711	transcription elongation factor A protein 1	-1.35314	GO:0005669 - transcription factor TFIID complex; GO:0005730 - nucleolus;;	GO:0003677 - DNA binding; GO:0003746 - translation elongation factor activity; GO:0005515 - protein binding; GO:0008270 - zinc ion binding	GO:0006414 -translational elongation; GO:0030218 - erythrocyte differentiation; GO:0045944 - positive regulation of transcription by RNA polymerase II; GO:1901919 - positive regulation of exoribonuclease activity
tr|A0A0R4J0S8|A0A0R4J0S8_MOUSE	A0A0R4J0S8	uroplakin 3B	-1.31393	GO:0005886 - plasma membrane; GO:0016021 - integral component of membrane		GO:0010629 -negative regulation of gene expression; GO:0046325 - negative regulation of glucose import
sp|Q9JJI8|RL38_MOUSE	Q9JJI8	60S ribosomal protein L38	-1.31244	GO:0014069 - postsynaptic density; GO:0022625 - cytosolic large ribosomal subunit; GO:0033291 - eukaryotic 80S initiation complex; GO:0042788 - polysomal ribosome;;;;;	GO:0003735 - structural constituent of ribosome;;;;;;;;	GO:0001501 -skeletal system development; GO:0001503 - ossification; GO:0002181 - cytoplasmic translation; GO:0006417 - regulation of translation; GO:0007605 - sensory perception of sound; GO:0034463 - 90S preribosome assembly; GO:0042474 - middle ear morphogenesis; GO:0043009 - chordate embryonic development; GO:0048318 - axial mesoderm development
tr|F6VG99|F6VG99_MOUSE	F6VG99	LIM domain only protein 7 isoform X15	-1.28625
sp|Q99LX0|PARK7_MOUSE	Q99LX0	protein/nucleic acid deglycase DJ-1	-1.27072	GO:0005634 - nucleus; GO:0005739 - mitochondrion; GO:0005829 - cytosol; GO:0005886 - plasma membrane; GO:0030424 - axon; GO:0045121 - membrane raft;;;;;	GO:0016684 - oxidoreductase activity, acting on peroxide as acceptor; GO:1903136 - cuprous ion binding;;;;;;;;;	GO:0006914 -autophagy; GO:0007338 - single fertilization; GO:0010273 - detoxification of copper ion; GO:0016570 - histone modification; GO:0031334 - positive regulation of protein-containing complex assembly; GO:0033138 - positive regulation of peptidyl-serine phosphorylation; GO:0043066 - negative regulation of apoptotic process; GO:0051444 - negative regulation of ubiquitin-protein transferase …
sp|Q9D358|PPAC_MOUSE	Q9D358	Acid phosphatase 1, soluble	-1.26099	GO:0005829 - cytosol; GO:0009898 - cytoplasmic side of plasma membrane; GO:0042383 - sarcolemma	GO:0003993 - acid phosphatase activity; GO:0004726 - non-membrane spanning protein tyrosine phosphatase activity;	GO:0035335 -peptidyl-tyrosine dephosphorylation;;
sp|P55264|ADK_MOUSE	P55264	adenosine kinase isoform X1	-1.23168	GO:0005654 - nucleoplasm; GO:0005829 - cytosol; GO:0005886 - plasma membrane;;;;;	GO:0004001 - adenosine kinase activity; GO:0005524 - ATP binding; GO:0046872 - metal ion binding;;;;;	GO:0006166 -purine ribonucleoside salvage; GO:0006175 - dATP biosynthetic process; GO:0010613 - positive regulation of cardiac muscle hypertrophy; GO:0016310 - phosphorylation; GO:0042102 - positive regulation of T cell proliferation; GO:0044209 - AMP salvage; GO:0044342 - type B pancreatic cell proliferation; GO:0046085 - adenosine metabolic process
tr|Q6ZWZ7|Q6ZWZ7_MOUSE	Q6ZWZ7	60S ribosomal protein L17	-1.20135	GO:0015934 - large ribosomal subunit	GO:0003735 - structural constituent of ribosome	GO:0006412 -translation
sp|P62267|RS23_MOUSE	P62267	40S ribosomal protein S23	-1.19574	GO:0005783 - endoplasmic reticulum; GO:0022627 - cytosolic small ribosomal subunit; GO:0042788 - polysomal ribosome; GO:0045202 - synapse	GO:0003735 - structural constituent of ribosome;;;	GO:0002181 -cytoplasmic translation; GO:0006614 - SRP-dependent cotranslational protein targeting to membrane; GO:0034063 - stress granule assembly; GO:1990145 - maintenance of translational fidelity
tr|A0A3B2WBF8|A0A3B2WBF8_MOUSE	A0A3B2WBF8	xanthine dehydrogenase/oxidase	-1.19279	GO:0005615 - extracellular space; GO:0005777 - peroxisome; GO:0005829 - cytosol; GO:0016529 - sarcoplasmic reticulum;;;;;;;;;;;;;;;;;;;;;;;	GO:0004854 - xanthine dehydrogenase activity; GO:0004855 - xanthine oxidase activity; GO:0005506 - iron ion binding; GO:0009055 - electron transfer activity; GO:0030151 - molybdenum ion binding; GO:0042803 - protein homodimerization activity; GO:0043546 - molybdopterin cofactor binding; GO:0050421 - nitrite reductase (NO-forming) activity; GO:0051537 - 2 iron, 2 sulfur cluster binding; GO:0070674…	GO:0001933 -negative regulation of protein phosphorylation; GO:0001937 - negative regulation of endothelial cell proliferation; GO:0006147 - guanine catabolic process; GO:0006148 - inosine catabolic process; GO:0006149 - deoxyinosine catabolic process; GO:0006154 - adenosine catabolic process; GO:0006157 - deoxyadenosine catabolic process; GO:0006161 - deoxyguanosine catabolic process; GO:0006196…
tr|A2ATU9|A2ATU9_MOUSE	A2ATU9	histone acetyltransferase type B catalytic subunit	-1.15975	GO:0000781 - chromosome, telomeric region; GO:0000785 - chromatin; GO:0005654 - nucleoplasm; GO:0005739 - mitochondrion; GO:0016363 - nuclear matrix; GO:0032991 - protein-containing complex	GO:0010485 - H4 histone acetyltransferase activity; GO:0042393 - histone binding;;;;	GO:0006335 -DNA replication-dependent chromatin assembly; GO:0006336 - DNA replication-independent chromatin assembly; GO:0031509 - subtelomeric heterochromatin assembly; GO:0043967 - histone H4 acetylation;;
tr|E9Q4Q2|E9Q4Q2_MOUSE	E9Q4Q2	splicing factor 1 isoform X7	-1.10523	GO:0005681 - spliceosomal complex; GO:0005737 - cytoplasm; GO:0016604 - nuclear body;;;	GO:0003729 - mRNA binding; GO:0008270 - zinc ion binding; GO:0042802 - identical protein binding; GO:0045131 - pre-mRNA branch point binding;;	GO:0030238 -male sex determination; GO:0030575 - nuclear body organization; GO:0033327 - Leydig cell differentiation; GO:0048024 - regulation of mRNA splicing, via spliceosome; GO:0048662 - negative regulation of smooth muscle cell proliferation; GO:0050810 - regulation of steroid biosynthetic process
tr|A0A5F8MPY2|A0A5F8MPY2_MOUSE	A0A5F8MPY2	60S acidic ribosomal protein P2 isoform X1	-1.10435	GO:0022625 - cytosolic large ribosomal subunit; GO:0045202 - synapse	GO:0003735 - structural constituent of ribosome	GO:0002182 -cytoplasmic translational elongation
tr|A0A0N4SVS6|A0A0N4SVS6_MOUSE	A0A0N4SVS6	cellular nucleic acid-binding protein isoform X4	-1.04021		GO:0003676 -nucleic acid binding; GO:0008270 - zinc ion binding
sp|P97494|GSH1_MOUSE	P97494	glutamate--cysteine ligase catalytic subunit	-1.03289	GO:0005739 - mitochondrion; GO:0005829 - cytosol; GO:0017109 - glutamate-cysteine ligase complex;;;;;;;;;;;;;;;;;;;;;;;;;;;;;	GO:0000287 - magnesium ion binding; GO:0004357 - glutamate-cysteine ligase activity; GO:0005515 - protein binding; GO:0005524 - ATP binding; GO:0016595 - glutamate binding; GO:0043531 - ADP binding; GO:0044877 - protein-containing complex binding;;;;;;;;;;;;;;;;;;;;;;;;;	GO:0006534 -cysteine metabolic process; GO:0006536 - glutamate metabolic process; GO:0006750 - glutathione biosynthetic process; GO:0006979 - response to oxidative stress; GO:0007568 - aging; GO:0007584 - response to nutrient; GO:0009408 - response to heat; GO:0009410 - response to xenobiotic stimulus; GO:0014823 - response to activity; GO:0019852 - L-ascorbic acid metabolic process; GO:0031397 -…
sp|P47739|AL3A1_MOUSE	P47739	aldehyde dehydrogenase, dimeric NADP-preferring isoform X2	-0.969791	GO:0005783 - endoplasmic reticulum; GO:0005829 - cytosol; GO:0005886 - plasma membrane; GO:0016021 - integral component of membrane;;;;	GO:0004028 - 3-chloroallyl aldehyde dehydrogenase activity; GO:0008106 - alcohol dehydrogenase (NADP+) activity; GO:0018479 - benzaldehyde dehydrogenase (NAD+) activity;;;;;	GO:0001666 -response to hypoxia; GO:0006081 - cellular aldehyde metabolic process; GO:0007568 - aging; GO:0007584 - response to nutrient; GO:0008284 - positive regulation of cell population proliferation; GO:0009410 - response to xenobiotic stimulus; GO:0051384 - response to glucocorticoid; GO:0051591 - response to cAMP
tr|Q9CQM8|Q9CQM8_MOUSE	Q9CQM8	60S ribosomal protein L21	-0.942649	GO:0005783 - endoplasmic reticulum; GO:0022625 - cytosolic large ribosomal subunit;;;;	GO:0003723 - RNA binding; GO:0003735 - structural constituent of ribosome; GO:0005515 - protein binding;;;	GO:0000184 -nuclear-transcribed mRNA catabolic process, nonsense-mediated decay; GO:0002181 - cytoplasmic translation; GO:0006364 - rRNA processing; GO:0006413 - translational initiation; GO:0006614 - SRP-dependent cotranslational protein targeting to membrane; GO:0019083 - viral transcription
sp|Q91VR7|MLP3A_MOUSE	Q91VR7	microtubule-associated proteins 1A/1B light chain 3A	-0.880641	GO:0000421 - autophagosome membrane; GO:0005770 - late endosome; GO:0005829 - cytosol; GO:0005874 - microtubule; GO:0044754 - autolysosome; GO:0045202 - synapse;;;;	GO:0008017 - microtubule binding; GO:0008429 - phosphatidylethanolamine binding; GO:0031625 - ubiquitin protein ligase binding;;;;;;;	GO:0000045 -autophagosome assembly; GO:0000422 - autophagy of mitochondrion; GO:0006995 - cellular response to nitrogen starvation; GO:0010040 - response to iron(II) ion; GO:0010288 - response to lead ion; GO:0034198 - cellular response to amino acid starvation; GO:0043278 - response to morphine; GO:0070301 - cellular response to hydrogen peroxide; GO:0071280 - cellular response to copper ion; GO…
sp|Q8BIJ6|SYIM_MOUSE	Q8BIJ6	isoleucine--tRNA ligase, mitochondrial precursor	-0.78277	GO:0005759 - mitochondrial matrix;;;	GO:0000049 - tRNA binding; GO:0002161 - aminoacyl-tRNA editing activity; GO:0004822 - isoleucine-tRNA ligase activity; GO:0005524 - ATP binding	GO:0006428 -isoleucyl-tRNA aminoacylation; GO:0032543 - mitochondrial translation; GO:0106074 - aminoacyl-tRNA metabolism involved in translational fidelity;

## Sheet: MPSIEC Membrane UP-regulated
Protein ID	Uniprot Accession	Description	Log2FC	GO IDs (CC)	GO IDs (MF)	GO IDs (BP)
sp|Q9QZQ8|H2AY_MOUSE	Q9QZQ8	core histone macro-H2A.1 isoform X1	3.8018	GO:0000786 - nucleosome; GO:0000793 - condensed chromosome; GO:0001740 - Barr body; GO:0005654 - nucleoplasm; GO:0005721 - pericentric heterochromatin; GO:0005730 - nucleolus; GO:0005813 - centrosome	GO:0000182 - rDNA binding; GO:0000979 - RNA polymerase II core promoter sequence-specific DNA binding; GO:0010385 - double-stranded methylated DNA binding; GO:0019901 - protein kinase binding; GO:0030291 - protein serine/threonine kinase inhibitor activity; GO:0031492 - nucleosomal DNA binding; GO:0046982 - protein heterodimerization activity; GO:1990841 - promoter-specific chromatin binding	GO:0000122 -negative regulation of transcription by RNA polymerase II; GO:0006334 - nucleosome assembly; GO:0007549 - dosage compensation; GO:0019216 - regulation of lipid metabolic process; GO:0031507 - heterochromatin assembly; GO:0033128 - negative regulation of histone phosphorylation; GO:0034184 - positive regulation of maintenance of mitotic sister chromatid cohesion; GO:0045618 - positive …
sp|P48678|LMNA_MOUSE	P48678	lamin A, isoform CRA_b	3.08664	GO:0005638 - lamin filament; GO:0005829 - cytosol; GO:0016363 - nuclear matrix; GO:0016607 - nuclear speck; GO:0031965 - nuclear membrane; GO:0035861 - site of double-strand break		GO:0006606 -protein import into nucleus; GO:0006998 - nuclear envelope organization; GO:0010628 - positive regulation of gene expression; GO:0030334 - regulation of cell migration; GO:0030951 - establishment or maintenance of microtubule cytoskeleton polarity; GO:0031647 - regulation of protein stability; GO:0055015 - ventricular cardiac muscle cell development; GO:0071456 - cellular response to …
sp|O54941|SMCE1_MOUSE	O54941	SWI/SNF-related matrix-associated actin-dependent regulator of chromatin subfamily E member 1	2.46954	GO:0005654 - nucleoplasm; GO:0016514 - SWI/SNF complex; GO:0071564 - npBAF complex; GO:0071565 - nBAF complex;	GO:0003677 - DNA binding; GO:0003723 - RNA binding; GO:0008080 - N-acetyltransferase activity; GO:0016922 - nuclear receptor binding; GO:0047485 - protein N-terminus binding	GO:0006337 -nucleosome disassembly; GO:0006338 - chromatin remodeling; GO:0022008 - neurogenesis; GO:0045892 - negative regulation of transcription, DNA-templated;
sp|P14733|LMNB1_MOUSE	P14733	Lmnb1 protein	2.39638	GO:0005637 - nuclear inner membrane; GO:0005638 - lamin filament; GO:0005654 - nucleoplasm; GO:0005737 - cytoplasm; GO:0016363 - nuclear matrix	GO:0008432 - JUN kinase binding; GO:0043274 - phospholipase binding; GO:1990837 - sequence-specific double-stranded DNA binding;;	GO:0010971 -positive regulation of G2/M transition of mitotic cell cycle; GO:0046330 - positive regulation of JNK cascade; GO:1904609 - cellular response to monosodium L-glutamate;;
sp|A2ARV4|LRP2_MOUSE	A2ARV4	low-density lipoprotein receptor-related protein 2	2.26743	GO:0005615 - extracellular space; GO:0005783 - endoplasmic reticulum; GO:0005794 - Golgi apparatus; GO:0005905 - clathrin-coated pit; GO:0009897 - external side of plasma membrane; GO:0016021 - integral component of membrane; GO:0016324 - apical plasma membrane; GO:0030139 - endocytic vesicle; GO:0030425 - dendrite; GO:0031526 - brush border membrane; GO:0031904 - endosome lumen; GO:0043235 - rec…	GO:0005509 - calcium ion binding; GO:0016922 - nuclear receptor binding; GO:0017124 - SH3 domain binding; GO:0030165 - PDZ domain binding; GO:0030492 - hemoglobin binding; GO:0031994 - insulin-like growth factor I binding; GO:0042562 - hormone binding; GO:0044877 - protein-containing complex binding; GO:0050750 - low-density lipoprotein particle receptor binding; GO:0051087 - chaperone binding; G…	GO:0001822 -kidney development; GO:0001843 - neural tube closure; GO:0003139 - secondary heart field specification; GO:0003148 - outflow tract septum morphogenesis; GO:0003223 - ventricular compact myocardium morphogenesis; GO:0003281 - ventricular septum development; GO:0006766 - vitamin metabolic process; GO:0007605 - sensory perception of sound; GO:0008584 - male gonad development; GO:0010165 …
sp|Q99JF5|MVD1_MOUSE	Q99JF5	diphosphomevalonate decarboxylase	2.138	GO:0005782 - peroxisomal matrix; GO:0005829 - cytosol;;	GO:0004163 - diphosphomevalonate decarboxylase activity; GO:0005524 - ATP binding; GO:0030544 - Hsp70 protein binding; GO:0042803 - protein homodimerization activity	GO:0006695 -cholesterol biosynthetic process; GO:0008284 - positive regulation of cell population proliferation; GO:0019287 - isopentenyl diphosphate biosynthetic process, mevalonate pathway;
sp|Q8CAQ8|MIC60_MOUSE	Q8CAQ8	MICOS complex subunit MIC60 isoform X1	2.0541	GO:0005758 - mitochondrial intermembrane space; GO:0061617 - MICOS complex	GO:0005515 - protein binding;	GO:0042407 -cristae formation; GO:0051560 - mitochondrial calcium ion homeostasis
sp|P52480|KPYM_MOUSE	P52480	pyruvate kinase PKM isoform X1	1.9379	GO:0005634 - nucleus; GO:0005791 - rough endoplasmic reticulum; GO:0005829 - cytosol; GO:0005929 - cilium; GO:1902912 - pyruvate kinase complex;;;;;;	GO:0000287 - magnesium ion binding; GO:0003729 - mRNA binding; GO:0004743 - pyruvate kinase activity; GO:0005524 - ATP binding; GO:0016301 - kinase activity; GO:0030955 - potassium ion binding; GO:0042802 - identical protein binding; GO:0043531 - ADP binding; GO:0070324 - thyroid hormone binding;;	GO:0001889 -liver development; GO:0006006 - glucose metabolic process; GO:0006096 - glycolytic process; GO:0006754 - ATP biosynthetic process; GO:0012501 - programmed cell death; GO:0031100 - animal organ regeneration; GO:0032869 - cellular response to insulin stimulus; GO:0042866 - pyruvate biosynthetic process; GO:0043403 - skeletal muscle tissue regeneration; GO:1903672 - positive regulation o…
sp|P17742|PPIA_MOUSE	P17742	peptidyl-prolyl cis-trans isomerase A	1.92902	GO:0005576 - extracellular region; GO:0005634 - nucleus; GO:0005829 - cytosol; GO:0032991 - protein-containing complex	GO:0003755 - peptidyl-prolyl cis-trans isomerase activity; GO:0005178 - integrin binding; GO:0016018 - cyclosporin A binding; GO:1904399 - heparan sulfate binding	GO:0000187 -obsolete activation of MAPK activity; GO:0000413 - protein peptidyl-prolyl isomerization; GO:0006457 - protein folding; GO:0006469 - negative regulation of protein kinase activity; GO:0030182 - neuron differentiation; GO:0030593 - neutrophil chemotaxis; GO:0032148 - activation of protein kinase B activity; GO:0032873 - negative regulation of stress-activated MAPK cascade; GO:0034389 -…
sp|Q60598|SRC8_MOUSE	Q60598	src substrate cortactin isoform X1	1.8922	GO:0001726 - ruffle; GO:0002102 - podosome; GO:0005794 - Golgi apparatus; GO:0005829 - cytosol; GO:0005884 - actin filament; GO:0005905 - clathrin-coated pit; GO:0005925 - focal adhesion; GO:0008076 - voltage-gated potassium channel complex; GO:0030027 - lamellipodium; GO:0030426 - growth cone; GO:0030864 - cortical actin cytoskeleton; GO:0043197 - dendritic spine; GO:0098871 - postsynaptic actin…	GO:0005522 - profilin binding; GO:0051015 - actin filament binding; GO:0070064 - proline-rich region binding; GO:0071933 - Arp2/3 complex binding;;;;;;;;;;;	GO:0006886 -intracellular protein transport; GO:0006898 - receptor-mediated endocytosis; GO:0006930 - substrate-dependent cell migration, cell extension; GO:0030516 - regulation of axon extension; GO:0030838 - positive regulation of actin filament polymerization; GO:0031532 - actin cytoskeleton reorganization; GO:0045987 - positive regulation of smooth muscle contraction; GO:0048041 - focal adhes…
sp|Q3UM45|PP1R7_MOUSE	Q3UM45	protein phosphatase 1 regulatory subunit 7	1.77131	GO:0005634 - nucleus; GO:0005694 - chromosome;	GO:0005515 - protein binding;;	GO:0007059 -chromosome segregation; GO:0035307 - positive regulation of protein dephosphorylation;
sp|O55142|RL35A_MOUSE	O55142	60S ribosomal protein L35a	1.74226	GO:0022625 - cytosolic large ribosomal subunit;;	GO:0000049 - tRNA binding; GO:0003735 - structural constituent of ribosome; GO:0043021 - ribonucleoprotein complex binding	GO:0002181 -cytoplasmic translation; GO:0006364 - rRNA processing; GO:0042273 - ribosomal large subunit biogenesis
tr|A0A1D5RLY6|A0A1D5RLY6_MOUSE	A0A1D5RLY6	Microtubule-associated protein 1S	1.62269
sp|Q9CRD0|OCAD1_MOUSE	Q9CRD0	OCIA domain-containing protein 1 isoform X2	1.54693	GO:0005768 - endosome	GO:0005515 - protein binding	GO:2000736 -regulation of stem cell differentiation
sp|P14069|S10A6_MOUSE	P14069	protein S100-A6	1.52616	GO:0001726 - ruffle; GO:0005635 - nuclear envelope; GO:0005829 - cytosol; GO:0031234 - extrinsic component of cytoplasmic side of plasma membrane; GO:0048471 - perinuclear region of cytoplasm;;	GO:0005509 - calcium ion binding; GO:0005523 - tropomyosin binding; GO:0008270 - zinc ion binding; GO:0015075 - ion transmembrane transporter activity; GO:0042803 - protein homodimerization activity; GO:0044548 - S100 protein binding; GO:0048306 - calcium-dependent protein binding	GO:0034220 -ion transmembrane transport
sp|P49717|MCM4_MOUSE	P49717	DNA replication licensing factor MCM4	1.49163	GO:0042555 - MCM complex; GO:0071162 - CMG complex;;;;	GO:0003678 - DNA helicase activity; GO:0003688 - DNA replication origin binding; GO:0003697 - single-stranded DNA binding; GO:0005515 - protein binding; GO:0005524 - ATP binding; GO:0016787 - hydrolase activity	GO:0000727 -double-strand break repair via break-induced replication; GO:0006267 - pre-replicative complex assembly involved in nuclear cell cycle DNA replication; GO:0006268 - DNA unwinding involved in DNA replication; GO:0006271 - DNA strand elongation involved in DNA replication; GO:1902975 - mitotic DNA replication initiation;
sp|Q9JJ28|FLII_MOUSE	Q9JJ28	protein flightless-1 homolog isoform X1	1.42791	GO:0005654 - nucleoplasm; GO:0005829 - cytosol; GO:0005903 - brush border; GO:0005925 - focal adhesion; GO:0015629 - actin cytoskeleton; GO:0034451 - centriolar satellite	GO:0005546 - phosphatidylinositol-4,5-bisphosphate binding; GO:0051015 - actin filament binding;;;;	GO:0007275 -multicellular organism development; GO:0030239 - myofibril assembly; GO:0051014 - actin filament severing; GO:0051016 - barbed-end actin filament capping;;
sp|P83917|CBX1_MOUSE	P83917	chromobox protein homolog 1	1.40997	GO:0000781 - chromosome, telomeric region; GO:0001939 - female pronucleus; GO:0001940 - male pronucleus; GO:0005721 - pericentric heterochromatin; GO:0005819 - spindle; GO:0010369 - chromocenter; GO:0090734 - site of DNA damage	GO:0042802 - identical protein binding; GO:1990226 - histone methyltransferase binding	GO:0006974 -cellular response to DNA damage stimulus; GO:0045892 - negative regulation of transcription, DNA-templated
sp|Q62376|RU17_MOUSE	Q62376	small nuclear ribonucleoprotein 70kDa polypeptide (RNP antigen), isoform CRA_g	1.22337	GO:0005634 - nucleus	GO:0030619 -U1 snRNA binding
sp|Q9R1Q7|PLP2_MOUSE	Q9R1Q7	proteolipid protein 2	1.0711	GO:0005886 - plasma membrane; GO:0016021 - integral component of membrane	GO:0019956 -chemokine binding

## Sheet: MPSIEC Membrane DOWN-regulated
Protein ID	Uniprot Accession	Description	Log2FC	GO IDs (CC)	GO IDs (MF)	GO IDs (BP)
sp|Q8CI94|PYGB_MOUSE	Q8CI94	glycogen phosphorylase, brain form	-3.74818	GO:0005737 - cytoplasm; GO:0030424 - axon	GO:0008184 - glycogen phosphorylase activity; GO:0030170 - pyridoxal phosphate binding; GO:0030246 - carbohydrate binding; GO:0042802 - identical protein binding; GO:0102250 - linear malto-oligosaccharide phosphorylase activity; GO:0102499 - SHG alpha-glucan phosphorylase activity;;	GO:0005980 -glycogen catabolic process
tr|O88374|O88374_MOUSE	O88374	Branched chain aminotransferase 2, mitochondrial	-3.1791	GO:0005634 - nucleus; GO:0005739 - mitochondrion	GO:0050048 - L-leucine:2-oxoglutarate aminotransferase activity; GO:0052654 - L-leucine transaminase activity; GO:0052655 - L-valine transaminase activity; GO:0052656 - L-isoleucine transaminase activity;;	GO:0006550 -isoleucine catabolic process; GO:0006551 - leucine metabolic process; GO:0008652 - cellular amino acid biosynthetic process; GO:0009082 - branched-chain amino acid biosynthetic process; GO:0010817 - regulation of hormone levels; GO:1990830 - cellular response to leukemia inhibitory factor
sp|Q80U93|NU214_MOUSE	Q80U93	mKIAA0023 protein	-3.07316	GO:1990876 - cytoplasmic side of nuclear pore	GO:0005049 - nuclear export signal receptor activity; GO:0008139 - nuclear localization sequence binding; GO:0017056 - structural constituent of nuclear pore	GO:0000278 -mitotic cell cycle; GO:0006406 - mRNA export from nucleus; GO:0006606 - protein import into nucleus; GO:0006611 - protein export from nucleus; GO:0046822 - regulation of nucleocytoplasmic transport; GO:0051726 - regulation of cell cycle	P:GO:0001998; P:GO:0002033; P:GO:0006006; P:GO:0006695; P:GO:0006741; P:GO:0006749; P:GO:0009051; P:GO:0010734; P:GO:0019322; P:GO:0034599; P:GO:0040014; P:GO:0043249; P:GO:0043523; P:GO:0045471; P:GO:0046390; P:GO:0061052; P:GO:1904879; P:GO:2000378; F:GO:0004345; F:GO:0005536; F:GO:0042803; F:GO:0050661; C:GO:0005634; C:GO:0005829; C:GO:0009898; C:GO:0034451	P:angiotensin-mediated vasoconstriction involved in regulation of systemic arterial blood pressure; P:angiotensin-mediated vasodilation involved in regulation of systemic arterial blood pressure; P:glucose metabolic process; P:cholesterol biosynthetic process; P:NADP biosynthetic process; P:glutathione metabolic process; P:pentose-phosphate shunt, oxidative branch; P:negative regulation of protei…
sp|Q00612|G6PD1_MOUSE	Q00612	glucose-6-phosphate 1-dehydrogenase	-2.84626	GO:0005634 - nucleus; GO:0005829 - cytosol; GO:0009898 - cytoplasmic side of plasma membrane; GO:0034451 - centriolar satellite;;;;;;;;;;;;;;	GO:0004345 - glucose-6-phosphate dehydrogenase activity; GO:0005536 - glucose binding; GO:0042803 - protein homodimerization activity; GO:0050661 - NADP binding;;;;;;;;;;;;;;	GO:0001998 -angiotensin-mediated vasoconstriction involved in regulation of systemic arterial blood pressure; GO:0002033 - angiotensin-mediated vasodilation involved in regulation of systemic arterial blood pressure; GO:0006006 - glucose metabolic process; GO:0006695 - cholesterol biosynthetic process; GO:0006741 - NADP biosynthetic process; GO:0006749 - glutathione metabolic process; GO:0009051 …
sp|Q3UPL0|SC31A_MOUSE	Q3UPL0	protein transport protein Sec31A isoform X1	-2.44765	GO:0005768 - endosome; GO:0005789 - endoplasmic reticulum membrane; GO:0005829 - cytosol; GO:0030127 - COPII vesicle coat; GO:0048471 - perinuclear region of cytoplasm; GO:0070971 - endoplasmic reticulum exit site	GO:0005198 - structural molecule activity; GO:0048306 - calcium-dependent protein binding;;;;	GO:0006886 -intracellular protein transport; GO:0007029 - endoplasmic reticulum organization; GO:0051592 - response to calcium ion; GO:0090110 - COPII-coated vesicle cargo loading;;
sp|Q99N87|RT05_MOUSE	Q99N87	28S ribosomal protein S5, mitochondrial	-2.39763	GO:0005763 - mitochondrial small ribosomal subunit	GO:0003723 - RNA binding; GO:0003735 - structural constituent of ribosome	GO:0006412 -translation
tr|Q3UJB0|Q3UJB0_MOUSE	Q3UJB0	splicing factor 3b, subunit 2	-2.32831	GO:0005686 - U2 snRNP; GO:0005689 - U12-type spliceosomal complex; GO:0016607 - nuclear speck; GO:0071005 - U2-type precatalytic spliceosome; GO:0071013 - catalytic step 2 spliceosome	GO:0005515 - protein binding;;;;	GO:0000398 -mRNA splicing, via spliceosome;;;;
tr|E9QLA5|E9QLA5_MOUSE	E9QLA5	2610204M08Rik protein	-2.23516	GO:0048471 - perinuclear region of cytoplasm;;	GO:0003779 - actin binding; GO:0031267 - small GTPase binding;	GO:0030036 -actin cytoskeleton organization; GO:0032535 - regulation of cellular component size; GO:0090140 - regulation of mitochondrial fission
sp|P07356|ANXA2_MOUSE	P07356	annexin A2	-2.1787	GO:0001726 - ruffle; GO:0005604 - basement membrane; GO:0005634 - nucleus; GO:0005765 - lysosomal membrane; GO:0005769 - early endosome; GO:0005811 - lipid droplet; GO:0005829 - cytosol; GO:0005938 - cell cortex; GO:0009986 - cell surface; GO:0016323 - basolateral plasma membrane; GO:0019897 - extrinsic component of plasma membrane; GO:0030496 - midbody; GO:0031902 - late endosome membrane; GO:00…	GO:0001786 - phosphatidylserine binding; GO:0002020 - protease binding; GO:0004867 - serine-type endopeptidase inhibitor activity; GO:0005262 - calcium channel activity; GO:0005509 - calcium ion binding; GO:0005544 - calcium-dependent phospholipid binding; GO:0005546 - phosphatidylinositol-4,5-bisphosphate binding; GO:0008092 - cytoskeletal protein binding; GO:0019834 - phospholipase A2 inhibitor…	GO:0001525 -angiogenesis; GO:0001765 - membrane raft assembly; GO:0001921 - positive regulation of receptor recycling; GO:0001934 - positive regulation of protein phosphorylation; GO:0006900 - vesicle budding from membrane; GO:0007589 - body fluid secretion; GO:0010951 - negative regulation of endopeptidase activity; GO:0030199 - collagen fibril organization; GO:0031340 - positive regulation of v…
tr|Q3UXG7|Q3UXG7_MOUSE	Q3UXG7	Protein O-fucosyltransferase 1	-1.98046	GO:0005783 - endoplasmic reticulum; GO:0016020 - membrane;;;;;	GO:0046922 - peptide-O-fucosyltransferase activity;;;;;;	GO:0001525 -angiogenesis; GO:0001756 - somitogenesis; GO:0006004 - fucose metabolic process; GO:0007399 - nervous system development; GO:0007507 - heart development; GO:0008593 - regulation of Notch signaling pathway; GO:0036066 - protein O-linked fucosylation
sp|O88844|IDHC_MOUSE	O88844	isocitrate dehydrogenase [NADP] cytoplasmic	-1.95408	GO:0005739 - mitochondrion; GO:0005777 - peroxisome; GO:0005829 - cytosol	GO:0000287 - magnesium ion binding; GO:0004450 - isocitrate dehydrogenase (NADP+) activity; GO:0042803 - protein homodimerization activity; GO:0050661 - NADP binding; GO:0051287 - NAD binding	GO:0006097 -glyoxylate cycle; GO:0006099 - tricarboxylic acid cycle; GO:0006102 - isocitrate metabolic process; GO:0006103 - 2-oxoglutarate metabolic process; GO:0006739 - NADP metabolic process; GO:0006749 - glutathione metabolic process; GO:0006979 - response to oxidative stress; GO:0008585 - female gonad development; GO:0048545 - response to steroid hormone; GO:0060696 - regulation of phosphol…
sp|P27612|PLAP_MOUSE	P27612	phospholipase A-2-activating protein	-1.94846	GO:0005634 - nucleus; GO:0005737 - cytoplasm; GO:0045202 - synapse; GO:0070062 - extracellular exosome	GO:0016005 - phospholipase A2 activator activity; GO:0043130 - ubiquitin binding	GO:0006693 -prostaglandin metabolic process; GO:0006954 - inflammatory response; GO:0010992 - ubiquitin recycling; GO:0016236 - macroautophagy; GO:0032430 - positive regulation of phospholipase A2 activity; GO:0043161 - proteasome-mediated ubiquitin-dependent protein catabolic process; GO:0043162 - ubiquitin-dependent protein catabolic process via the multivesicular body sorting pathway; GO:00712…
tr|A0A087WNP6|A0A087WNP6_MOUSE	A0A087WNP6	protein CDV3 homolog isoform X2	-1.80896
tr|A0A2I3BS41|A0A2I3BS41_MOUSE	A0A2I3BS41	vinexin isoform X1	-1.66703	GO:0005634 - nucleus; GO:0005737 - cytoplasm; GO:0005856 - cytoskeleton; GO:0005925 - focal adhesion	GO:0017166 - vinculin binding	GO:0000122 -negative regulation of transcription by RNA polymerase II; GO:0031589 - cell-substrate adhesion; GO:0043410 - positive regulation of MAPK cascade; GO:0051496 - positive regulation of stress fiber assembly
sp|P61290|PSME3_MOUSE	P61290	proteasome activator complex subunit 3	-1.40937	GO:0005654 - nucleoplasm; GO:0005829 - cytosol; GO:0008537 - proteasome activator complex	GO:0002039 - p53 binding; GO:0042802 - identical protein binding; GO:0061133 - endopeptidase activator activity; GO:0097371 - MDM2/MDM4 family protein binding	GO:0000209 -protein polyubiquitination; GO:0002479 - antigen processing and presentation of exogenous peptide antigen via MHC class I, TAP-dependent; GO:0006521 - regulation of cellular amino acid metabolic process; GO:0010950 - positive regulation of endopeptidase activity; GO:0038095 - Fc-epsilon receptor signaling pathway; GO:0043687 - post-translational protein modification; GO:0050852 - T ce…
sp|P61205|ARF3_MOUSE	P61205	ADP-ribosylation factor 3	-1.38739		GO:0005525 - GTP binding
sp|Q6NXH9|K2C73_MOUSE	Q6NXH9	keratin, type II cytoskeletal 73	-1.36583	GO:0045095 - keratin filament
tr|Q9CQM8|Q9CQM8_MOUSE	Q9CQM8	60S ribosomal protein L21	-1.22692	GO:0005783 - endoplasmic reticulum; GO:0022625 - cytosolic large ribosomal subunit;;;;	GO:0003723 - RNA binding; GO:0003735 - structural constituent of ribosome; GO:0005515 - protein binding;;;	GO:0000184 -nuclear-transcribed mRNA catabolic process, nonsense-mediated decay; GO:0002181 - cytoplasmic translation; GO:0006364 - rRNA processing; GO:0006413 - translational initiation; GO:0006614 - SRP-dependent cotranslational protein targeting to membrane; GO:0019083 - viral transcription
sp|Q9D964|GATM_MOUSE	Q9D964	Glycine amidinotransferase (L-arginine:glycine amidinotransferase)	-1.17127	GO:0005743 - mitochondrial inner membrane	GO:0015068 - glycine amidinotransferase activity	GO:0006601 -creatine biosynthetic process
sp|P68134|ACTS_MOUSE	P68134	actin, alpha skeletal muscle	-1.03516	GO:0001725 - stress fiber; GO:0005829 - cytosol; GO:0005865 - striated muscle thin filament; GO:0005869 - dynactin complex; GO:0030027 - lamellipodium; GO:0030175 - filopodium; GO:0031674 - I band; GO:0031941 - filamentous actin; GO:0044297 - cell body; GO:0098723 - skeletal muscle myofibril; GO:0098978 - glutamatergic synapse	GO:0000287 - magnesium ion binding; GO:0003785 - actin monomer binding; GO:0005200 - structural constituent of cytoskeleton; GO:0005509 - calcium ion binding; GO:0005523 - tropomyosin binding; GO:0005524 - ATP binding; GO:0019904 - protein domain specific binding; GO:0031013 - troponin I binding; GO:0031432 - titin binding; GO:0032036 - myosin heavy chain binding; GO:0042802 - identical protein b…	GO:0009612 -response to mechanical stimulus; GO:0009991 - response to extracellular stimulus; GO:0010226 - response to lithium ion; GO:0010628 - positive regulation of gene expression; GO:0030041 - actin filament polymerization; GO:0030049 - muscle filament sliding; GO:0030240 - skeletal muscle thin filament assembly; GO:0043066 - negative regulation of apoptotic process; GO:0043503 - skeletal mu…
